# Supplementary material for: Relationship Between Pain and Delirium in Critically Ill Adults
Source: PubMed Central journal article supplement — Crit Care Explor. 2023 Dec 1;5(12):e1012. doi: 10.1097/CCE.0000000000001012 (PMC10695586; doi:10.1097/cce.0000000000001012), 2023-12-01
Supplement: cc9-5-e1012-s001.pdf [file cc9-5-e1012-s001.pdf]

## **Relationship Between Pain and Delirium in Critically Ill Adults**

### **Supplemental Digital Content (SDC)**

Page 2 **SDC 1. Supplemental Table 1.** Strobe Checklist.

Page 5. **SDC 2. Supplemental Table 2.** Conversion of opioids to morphine equivalents

Page 6. **SDC 3. Supplemental Table 3.** Description of MICE variables and imputation method

Page 8. **SDC 4. Supplemental Figure 1.** Transition matrix used in current study

Page 9. **SDC 5. Supplemental Table 4.** Description of missingness before and after MICE use

Page 11. **SDC 6. Supplemental Table 5.** Presence of maximum documented pain severity before and after MICE use

Page 12. **SDC 7. Supplemental Table 6.** Results of sensitivity analysis – use of complete case analysis (vs MICE)

Page 14. **SDC 8. Supplemental Table 7.** Results of sensitivity analysis – use of NRS (vs CPOT) pain assessment using complete case analysis cohort

Page 16. **SDC 9. Supplemental Table 8.** Results of sensitivity analysis – effect of time period (divided by three-year epochs) using MICE cohort

SDC 1. Supplemental Table 1. Strobe Checklist

|                              | Item No | Recommendation                                                                                                                                                                       | Page No |
|------------------------------|---------|--------------------------------------------------------------------------------------------------------------------------------------------------------------------------------------|---------|
| <b>Title and abstract</b>    | 1       | (a) Indicate the study's design with a commonly used term in the title or the abstract                                                                                               | 1       |
|                              |         | (b) Provide in the abstract an informative and balanced summary of what was done and what was found                                                                                  | 4       |
| <b>Introduction</b>          |         |                                                                                                                                                                                      |         |
| Background/rationale         | 2       | Explain the scientific background and rationale for the investigation being reported                                                                                                 | 5       |
| Objectives                   | 3       | State specific objectives, including any prespecified hypotheses                                                                                                                     | 5       |
| <b>Methods</b>               |         |                                                                                                                                                                                      |         |
| Study design                 | 4       | Present key elements of study design early in the paper                                                                                                                              | 6       |
| Setting                      | 5       | Describe the setting, locations, and relevant dates, including periods of recruitment, exposure, follow-up, and data collection                                                      | 6       |
| Participants                 | 6       | (a) Give the eligibility criteria, and the sources and methods of selection of participants. Describe methods of follow-up                                                           | 6       |
|                              |         | (b) For matched studies, give matching criteria and number of exposed and unexposed                                                                                                  | NA      |
| Variables                    | 7       | Clearly define all outcomes, exposures, predictors, potential confounders, and effect modifiers.<br>Give diagnostic criteria, if applicable                                          | 6-8     |
| Data sources/<br>measurement | 8*      | For each variable of interest, give sources of data and details of methods of assessment (measurement). Describe comparability of assessment methods if there is more than one group | 6-7     |
| Bias                         | 9       | Describe any efforts to address potential sources of bias                                                                                                                            | 7-8     |

|                        |     |                                                                                                                                                                                                     |                    |
|------------------------|-----|-----------------------------------------------------------------------------------------------------------------------------------------------------------------------------------------------------|--------------------|
| Study size             | 10  | Explain how the study size was arrived at                                                                                                                                                           | 6                  |
| Quantitative variables | 11  | Explain how quantitative variables were handled in the analyses. If applicable, describe which groupings were chosen and why                                                                        | 6-7                |
| Statistical methods    | 12  | (a) Describe all statistical methods, including those used to control for confounding                                                                                                               | 7-9                |
|                        |     | (b) Describe any methods used to examine subgroups and interactions                                                                                                                                 | 8-9                |
|                        |     | (c) Explain how missing data were addressed                                                                                                                                                         | 4, 6-7             |
|                        |     | (d) If applicable, explain how loss to follow-up was addressed                                                                                                                                      | NA                 |
|                        |     | (e) Describe any sensitivity analyses                                                                                                                                                               | 9                  |
| <b>Results</b>         |     |                                                                                                                                                                                                     |                    |
| Participants           | 13* | (a) Report numbers of individuals at each stage of study—eg numbers potentially eligible, examined for eligibility, confirmed eligible, included in the study, completing follow-up, and analysed   | Fig 1<br>10        |
|                        |     | (b) Give reasons for non-participation at each stage                                                                                                                                                | 10                 |
|                        |     | (c) Consider use of a flow diagram                                                                                                                                                                  | Fig 1              |
| Descriptive data       | 14* | (a) Give characteristics of study participants (eg demographic, clinical, social) and information on exposures and potential confounders                                                            | 10 Tables 1 and 2  |
|                        |     | (b) Indicate number of participants with missing data for each variable of interest                                                                                                                 | 8                  |
|                        |     | (c) Summarise follow-up time (eg, average and total amount)                                                                                                                                         | 8                  |
| Outcome data           | 15* | Report numbers of outcome events or summary measures over time                                                                                                                                      | 7-8, Suppl Table 4 |
| Main results           | 16  | (a) Give unadjusted estimates and, if applicable, confounder-adjusted estimates and their precision (eg, 95% confidence interval). Make clear which confounders were adjusted for and why they were | 10 Table 3         |

|                   |    |                                                                                                                                                                                                      |       |
|-------------------|----|------------------------------------------------------------------------------------------------------------------------------------------------------------------------------------------------------|-------|
|                   |    | included. (b) Report category boundaries when continuous variables were categorized (c) If relevant, consider translating estimates of relative risk into absolute risk for a meaningful time period |       |
| Other analyses    | 17 | Report other analyses done—eg analyses of subgroups and interactions, and sensitivity analyses                                                                                                       | 10    |
| <b>Discussion</b> |    |                                                                                                                                                                                                      |       |
| Key results       | 18 | Summarise key results with reference to study objectives                                                                                                                                             | 11    |
| Limitations       | 19 | Discuss limitations of the study, taking into account sources of potential bias or imprecision.<br>Discuss both direction and magnitude of any potential bias                                        | 12    |
| Interpretation    | 20 | Give a cautious overall interpretation of results considering objectives, limitations, multiplicity of analyses, results from similar studies, and other relevant evidence                           | 12    |
| Generalisability  | 21 | Discuss the generalisability (external validity) of the study results                                                                                                                                | 11-12 |
| Funding           | 22 | Give the source of funding and the role of the funders for the present study and, if applicable, for the original study on which the present article is based                                        | 1-2   |

**Note:** An Explanation and Elaboration article discusses each checklist item and gives methodological background and published examples of transparent reporting. The STROBE checklist is best used in conjunction with this article (freely available on the Web sites of PLoS Medicine at <http://www.plosmedicine.org/>, Annals of Internal Medicine at <http://www.annals.org/>, and Epidemiology at <http://www.epidem.com/>). Information on the STROBE Initiative is available at <http://www.strobe-statement.org>.

**SDC 2. Supplemental Table 2.** Conversion of opioids to morphine equivalents

| <b>Medication</b>       | <b>Conversion Factor<sup>†</sup></b> |
|-------------------------|--------------------------------------|
| Alfentanil              | * 10                                 |
| Fentanyl                | * 100                                |
| Fentanyl transdermal    | * 30                                 |
| Meperidine              | * 0.1                                |
| Piritramide             | * 0.75                               |
| Remifentanyl            | * 100                                |
| Sufentanil <sup>‡</sup> | * 0.5                                |

<sup>†</sup> All conversions are from milligrams of the agent to milligrams of intravenous morphine

<sup>‡</sup> Conversion from micrograms of sufentanil to milligrams of intravenous morphine

SDC 3. Supplemental Table 3. Description of MICE variables and imputation method

| Variable                                  | Variable Definition                                                    | Measure     | Imputation Method |
|-------------------------------------------|------------------------------------------------------------------------|-------------|-------------------|
| <b>Baseline</b>                           |                                                                        |             |                   |
| Age                                       | 18 – $\infty$                                                          | Continuous  | pmm               |
| Gender                                    | Male/Female                                                            | Binary      | logreg            |
| APACHE IV score                           | 0 – 220                                                                | Continuous  | pmm               |
| Charlson Comorbidity index                | 0–24                                                                   | Continuous  | pmm               |
| Body mass index                           | 0 – $\infty$                                                           | Continuous  | pmm               |
| Admission type                            | Medical/<br>Elective surgery/<br>Acute surgery                         | Categorical | polr              |
| Diagnosis of trauma                       | Yes (presence of trauma documented)/No                                 | Binary      | logreg            |
| Diagnosis of sepsis                       | Yes (presence of sepsis documented)/No                                 | Binary      | logreg            |
| High opioid use                           | Yes (IV morphine equivalent $\geq 25$ mg administered on ICU day 1)/No | Binary      | logreg            |
| <b>ICU day <math>t</math></b>             |                                                                        |             |                   |
| Maximum pain severity based on pain score | None/<br>Mild/<br>Moderate/<br>Severe                                  | Categorical | polr              |

|                                        |                                          |             |        |
|----------------------------------------|------------------------------------------|-------------|--------|
| mSOFA score                            | 0 – 20                                   | Continuous  | pmm    |
| Use of invasive mechanical ventilation | Yes/No                                   | Binary      | logreg |
| Agitation                              | Yes (RASS $\geq$ 2 documented)/No        | Binary      | logreg |
| Opioid use                             | Yes/No                                   | Binary      | logreg |
| Clonidine use                          | Yes/No                                   | Binary      | logreg |
| Gabapentin use                         | Yes/No                                   | Binary      | logreg |
| <b>ICU day <i>t-1</i></b>              |                                          |             |        |
| Maximum pain severity                  | None/<br>Mild/<br>Moderate/<br>Severe    | Categorical | polr   |
| NRS pain assessment                    | Yes (use of NRS only to assess pain)/No  | Binary      | logreg |
| CPOT pain assessment                   | Yes (use of CPOT only to assess pain)/No | Binary      | logreg |
| Presence of an unarousable state       | Yes/No                                   | Binary      | logreg |

SDC 4. Supplemental Figure 1. Transition matrix used in current study.

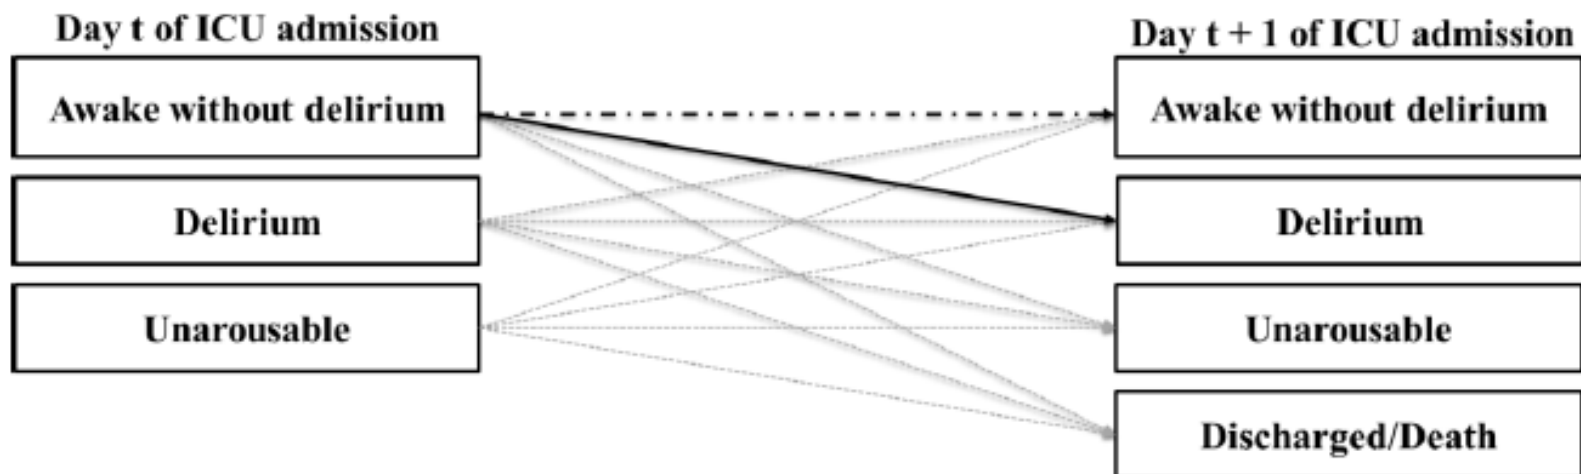

- · → = reference transition; —→ = transition of interest; ···→ = other possible transitions

ICU=intensive care unit



SDC 5. Supplemental Table 4. Description of missingness before and after MICE use

| Variable                                  | Missingness on days when patient not unarousable |            |
|-------------------------------------------|--------------------------------------------------|------------|
|                                           | Prior to MICE                                    | After MICE |
|                                           | <i>N=14013 ICU patient-days; N (%)</i>           |            |
| <b>Baseline</b>                           |                                                  |            |
| Age                                       | 0 (0.0%)                                         | 0 (0.0%)   |
| Gender                                    | 0 (0.0%)                                         | 0 (0.0%)   |
| APACHE IV score                           | 1239 (8.8%)                                      | 0 (0.0%)   |
| Charlson Comorbidity Index                | 1827 (13.0%)                                     | 0 (0.0%)   |
| Body Mass Index                           | 109 (0.8%)                                       | 0 (0.0%)   |
| Admission type                            | 0 (0.0%)                                         | 0 (0.0%)   |
| Diagnosis of trauma                       | 0 (0.0%)                                         | 0 (0.0%)   |
| Diagnosis of sepsis                       | 0 (0.0%)                                         | 0 (0.0%)   |
| High opioid use                           | 0 (0.0%)                                         | 0 (0.0%)   |
| <b>ICU day <i>t</i></b>                   |                                                  |            |
| Maximum pain severity based on pain score | 1866 (13.3%)                                     | 0 (0.0%)   |
| mSOFA score                               | 118 (0.8%)                                       | 0 (0.0%)   |
| Use of invasive mechanical ventilation    | 0 (0.0%)                                         | 0 (0.0%)   |
| Agitation                                 | 18 (0.1%)                                        | 0 (0.0%)   |

|                                  |                         |          |
|----------------------------------|-------------------------|----------|
| Opioid use                       | 0 (0.0%)                | 0 (0.0%) |
| Clonidine use                    | 0 (0.0%)                | 0 (0.0%) |
| Gabapentin use                   | 0 (0.0%)                | 0 (0.0%) |
| <b>ICU day <i>t-1</i></b>        |                         |          |
| Maximum pain severity            | 827 (5.9%) <sup>†</sup> | 0 (0.0%) |
| NRS pain assessment              | 827 (5.9%) <sup>†</sup> | 0 (0.0%) |
| CPOT pain assessment             | 827 (5.9%) <sup>†</sup> | 0 (0.0%) |
| Presence of an unarousable state | 0 (0.0%) <sup>†</sup>   | 0 (0.0%) |

<sup>†</sup>missingness was not counted if the patient was not in the ICU on day *t-1* (i.e. *t=1*)

**SDC 6. Supplemental Table 5.** Presence of maximum documented pain severity before and after MICE use

| Pain severity on day t                | ICU days with a maximum pain score |                                |         |
|---------------------------------------|------------------------------------|--------------------------------|---------|
|                                       | Before imputation<br>(n=10,566)    | After imputation<br>(n=12,432) | P-value |
| No clinically significant pain, n (%) | 4010 (38.0%)                       | 4747 (38.1%)                   | 0.72    |
| Mild pain, n (%)                      | 3561 (33.7%)                       | 4146 (33.3%)                   | 0.57    |
| Moderate pain, n (%)                  | 1980 (18.7%)                       | 2328 (16.6%)                   | 0.98    |
| Severe pain, n (%)                    | 1014 (9.6%)                        | 1211 (18.7%)                   | 0.71    |

**SDC 7. Supplemental Table 6.** Results of sensitivity analysis – use of complete case analysis.

| Mental Status          |                        | Pain                                       | Controlling for<br>Opioid Exposure and<br>Dose | Adjusted Odds<br>Ratio *†<br>(95% CI)<br>n=10566 |
|------------------------|------------------------|--------------------------------------------|------------------------------------------------|--------------------------------------------------|
| Day <i>t</i>           | Day <i>t+1</i>         |                                            |                                                |                                                  |
| Awake without delirium | Awake without delirium | No                                         | -                                              | Reference                                        |
| Awake without delirium | Delirium               | Mild/moderate/severe pain<br>(vs. no pain) | No                                             | 1.11 (0.79–1.26)                                 |
|                        |                        |                                            | Yes                                            | 0.95 (0.75–1.20)                                 |
|                        |                        |                                            | 10 mg MEQ                                      | 0.99 (0.78–1.25)                                 |
| Awake without delirium | Delirium               | Moderate/severe pain<br>(vs. no/mild pain) | No                                             | 0.93 (0.72–1.19)                                 |
|                        |                        |                                            | Yes                                            | 0.87 (0.68–1.12)                                 |
|                        |                        |                                            | 10 mg MEQ                                      | 0.93 (0.72–1.19)                                 |
| Awake without delirium | Delirium               | Severe pain<br>(vs. no/mild/moderate pain) | No                                             | 0.99 (0.67–1.45)                                 |
|                        |                        |                                            | Yes                                            | 0.93 (0.63–1.37)                                 |
|                        |                        |                                            | 10 mg MEQ                                      | 0.98 (0.67–1.45)                                 |
| Awake without delirium | Delirium               | Severe pain<br>(vs. no pain)               | No                                             | 1.01 (0.67–1.54)                                 |
|                        |                        |                                            | Yes                                            | 0.89 (0.58–1.36)                                 |
|                        |                        |                                            | 10 mg MEQ                                      | 1.01 (0.67–1.54)                                 |
| Awake without delirium | Delirium               | Moderate pain                              | No                                             | 0.93 (0.67–1.29)                                 |

|                        |          |                            |           |                  |
|------------------------|----------|----------------------------|-----------|------------------|
|                        |          | (vs. no pain)              | Yes       | 0.86 (0.62–1.20) |
|                        |          |                            | 10 mg MEQ | 0.93 (0.67–1.29) |
| Awake without delirium | Delirium | Mild pain<br>(vs. no pain) | No        | 1.02 (0.79–1.33) |
|                        |          |                            | Yes       | 0.99 (0.76–1.29) |
|                        |          |                            | 10 mg MEQ | 1.02 (0.79–1.33) |

\*Adjusted for time-fixed covariables, including admission category (medical, surgical, and trauma), age, sex, APACHE IV Score, body mass index, and Charlson Comorbidity Index.

†Adjusted for time-varying covariables on day  $t$ , including day of ICU admission, modified Sequential Organ Failure Assessment score (without neurologic component), use of invasive mechanical ventilation, use of a benzodiazepine, and use of an opioid.

**SDC 8. Supplemental Table 7.** Results of sensitivity analysis – use of NRS (vs CPOT) pain assessment using complete case analysis cohort

| Mental Status          |                        | Pain                                       | Controlling for<br>Opioid Exposure<br>and Dose | Adjusted Odds<br>Ratio <sup>*†</sup><br>(95% CI) |                     |
|------------------------|------------------------|--------------------------------------------|------------------------------------------------|--------------------------------------------------|---------------------|
| Day <i>t</i>           | Day <i>t+1</i>         |                                            |                                                | NRS only<br>n=6503                               | CPOT only<br>n=2607 |
| Awake without delirium | Awake without delirium | No                                         | -                                              | Reference                                        |                     |
| Awake without delirium | Delirium               | Mild/moderate/severe pain<br>(vs. no pain) | No                                             | 0.96 (0.72–1.29)                                 | 1.70 (0.95–3.05)    |
|                        |                        |                                            | Yes                                            | 0.92 (0.68–1.23)                                 | 1.09 (0.95–3.05)    |
|                        |                        |                                            | 10 mg MEQ                                      | 0.96 (0.72–1.28)                                 | 1.71 (0.95–3.07)    |
| Awake without delirium | Delirium               | Moderate/severe pain<br>(vs. no/mild pain) | No                                             | 1.04 (0.78–1.39)                                 | 1.00 (0.45–2.21)    |
|                        |                        |                                            | Yes                                            | 0.97 (0.72–1.30)                                 | 1.00 (0.45–2.20)    |
|                        |                        |                                            | 10 mg MEQ                                      | 1.04 (0.78–1.39)                                 | 1.03 (0.47–2.29)    |
| Awake without delirium | Delirium               | Severe pain<br>(vs. no/mild/moderate pain) | No                                             | 1.04 (0.67–1.62)                                 | 0.42 (0.09–2.01)    |
|                        |                        |                                            | Yes                                            | 0.98 (0.63–1.53)                                 | 0.42 (0.09–2.01)    |
|                        |                        |                                            | 10 mg MEQ                                      | 1.04 (0.67–1.61)                                 | 0.43 (0.09–2.03)    |
| Awake without delirium | Delirium               | Severe pain<br>(vs. no pain)               | No                                             | 1.06 (0.65–1.73)                                 | 0.73 (0.14–3.74)    |
|                        |                        |                                            | Yes                                            | 0.85 (0.51–1.41)                                 | 0.72 (0.14–3.70)    |
|                        |                        |                                            | 10 mg MEQ                                      | 1.06 (0.64–1.73)                                 | 0.74 (0.14–3.80)    |

|                        |          |                                |           |                  |                  |
|------------------------|----------|--------------------------------|-----------|------------------|------------------|
| Awake without delirium | Delirium | Moderate pain<br>(vs. no pain) | No        | 0.98 (0.67–1.44) | 2.04 (0.76–5.47) |
|                        |          |                                | Yes       | 0.89 (0.60–1.31) | 2.02 (0.75–5.42) |
|                        |          |                                | 10 mg MEQ | 0.98 (0.67–1.44) | 2.13 (0.79–5.71) |
| Awake without delirium | Delirium | Mild pain<br>(vs. no pain)     | No        | 0.92 (0.66–1.28) | 1.78 (0.96–3.30) |
|                        |          |                                | Yes       | 0.89 (0.64–1.24) | 1.78 (0.96–3.30) |
|                        |          |                                | 10 mg MEQ | 0.92 (0.66–1.28) | 1.77 (0.96–3.29) |

\*Adjusted for time-fixed covariables, including admission category (medical, surgical, and trauma), age, sex, APACHE IV Score, body mass index, and Charlson Comorbidity Index.

†Adjusted for time-varying covariables on day  $t$ , including day of ICU admission, modified Sequential Organ Failure Assessment score (without neurologic component), use of invasive mechanical ventilation, use of a benzodiazepine, and use of an opioid.

**SDC 9. Supplemental Table 8.** Results of sensitivity analysis – effect of time period (divided by three-year epochs) using MICE cohort

| Mental Status          |                        | Pain                                          | Controlling for<br>Opioid Exposure and<br>Dose | Time interval                              | Number of<br>days | Adjusted Odds<br>Ratio <sup>*†</sup><br>(95% CI) |      |                  |
|------------------------|------------------------|-----------------------------------------------|------------------------------------------------|--------------------------------------------|-------------------|--------------------------------------------------|------|------------------|
| Day <i>t</i>           | Day <i>t+1</i>         |                                               |                                                |                                            |                   |                                                  |      |                  |
| Awake without delirium | Awake without delirium | No                                            | -                                              | -                                          | -                 | Reference                                        |      |                  |
| Awake without delirium | Delirium               | Mild/moderate/severe<br>pain<br>(vs. no pain) | No                                             | 2011-2013                                  | 5596              | 1.00 (0.71–1.42)                                 |      |                  |
|                        |                        |                                               |                                                | 2015-2016                                  | 3819              | 0.99 (0.65–1.51)                                 |      |                  |
|                        |                        |                                               |                                                | 2017-2019                                  | 4598              | 1.00 (0.67–1.50)                                 |      |                  |
|                        |                        |                                               | Yes                                            | 2011-2013                                  | 5596              | 0.92 (0.64–1.31)                                 |      |                  |
|                        |                        |                                               |                                                | 2015-2016                                  | 3819              | 0.97(0.63–1.49)                                  |      |                  |
|                        |                        |                                               |                                                | 2017-2019                                  | 4598              | 0.98 (0.66–1.47)                                 |      |                  |
|                        |                        | 10 mg MEQ                                     | 2011-2013                                      | 5596                                       | 0.98 (0.69–1.39)  |                                                  |      |                  |
|                        |                        |                                               | 2015-2016                                      | 3819                                       | 0.99 (0.65–1.52)  |                                                  |      |                  |
|                        |                        |                                               | 2017-2019                                      | 4598                                       | 1.00 (0.67–1.48)  |                                                  |      |                  |
|                        |                        | Awake without delirium                        | Delirium                                       | Moderate/severe pain<br>(vs. no/mild pain) | No                | 2011-2013                                        | 5596 | 0.97 (0.69–1.37) |
|                        |                        |                                               |                                                |                                            |                   | 2015-2016                                        | 3819 | 0.82 (0.50–1.35) |
|                        |                        |                                               |                                                |                                            |                   | 2017-2019                                        | 4598 | 0.79 (0.49–1.27) |
| Yes                    | 2011-2013              |                                               |                                                | 5596                                       | 0.88 (0.62–1.25)  |                                                  |      |                  |
|                        | 2015-2016              |                                               |                                                | 3819                                       | 0.80 (0.48–1.33)  |                                                  |      |                  |
|                        | 2017-2019              |                                               |                                                | 4598                                       | 0.76 (0.47–1.23)  |                                                  |      |                  |



|                        |          |                                               |           |           |                  |                  |
|------------------------|----------|-----------------------------------------------|-----------|-----------|------------------|------------------|
|                        |          |                                               | 10 mg MEQ | 2011-2013 | 5596             | 0.64 (0.66–1.34) |
|                        |          |                                               |           | 2015-2016 | 3819             | 0.82 (0.50–1.35) |
|                        |          |                                               |           | 2017-2019 | 4598             | 0.79 (0.49–1.27) |
| Awake without delirium | Delirium | Severe pain<br>(vs. no/mild/moderate<br>pain) | No        | 2011-2013 | 5596             | 0.82 (0.49–1.38) |
|                        |          |                                               |           | 2015-2016 | 3819             | 1.03 (0.48–2.20) |
|                        |          |                                               |           | 2017-2019 | 4598             | 1.08 (0.54–2.18) |
|                        |          |                                               | Yes       | 2011-2013 | 5596             | 0.74 (0.44–1.25) |
|                        |          |                                               |           | 2015-2016 | 3819             | 1.01 (0.47–2.16) |
|                        |          |                                               |           | 2017-2019 | 4598             | 1.06 (0.52–2.13) |
|                        |          | 10 mg MEQ                                     | 2011-2013 | 5596      | 0.78 (0.46–1.32) |                  |
|                        |          |                                               | 2015-2016 | 3819      | 1.03 (0.48–2.20) |                  |
|                        |          |                                               | 2017-2019 | 4598      | 1.07 (0.53–2.16) |                  |
| Awake without delirium | Delirium | Severe pain<br>(vs. no pain)                  | No        | 2011-2013 | 5596             | 0.52 (0.48–1.50) |
|                        |          |                                               |           | 2015-2016 | 3819             | 1.07 (0.48–2.40) |
|                        |          |                                               |           | 2017-2019 | 4598             | 1.04 (0.49–2.22) |
|                        |          |                                               | Yes       | 2011-2013 | 5596             | 0.73 (0.41–1.30) |
|                        |          |                                               |           | 2015-2016 | 3819             | 1.05 (0.46–2.38) |
|                        |          |                                               |           | 2017-2019 | 4598             | 0.94 (0.44–2.02) |
|                        |          | 10 mg MEQ                                     | 2011-2013 | 5596      | 0.84 (0.45–1.48) |                  |
|                        |          |                                               | 2015-2016 | 3819      | 1.07 (0.48–2.41) |                  |

|                        |           |                                    |           |                                |                  |                  |      |                  |
|------------------------|-----------|------------------------------------|-----------|--------------------------------|------------------|------------------|------|------------------|
|                        |           |                                    |           | 2017-2019                      | 4598             | 1.03 (0.48–2.20) |      |                  |
| Awake without delirium | Delirium  | Moderate pain<br><br>(vs. no pain) | No        | 2011-2013                      | 5596             | 1.05 (0.67–1.63) |      |                  |
|                        |           |                                    |           | 2015-2016                      | 3819             | 1.08 (0.48–2.41) |      |                  |
|                        |           |                                    |           | 2017-2019                      | 4598             | 0.72 (0.38–1.36) |      |                  |
|                        |           |                                    | Yes       | 2011-2013                      | 5596             | 0.95 (0.61–1.49) |      |                  |
|                        |           |                                    |           | 2015-2016                      | 3819             | 0.78 (0.40–1.52) |      |                  |
|                        |           |                                    |           | 2017-2019                      | 4598             | 0.66 (0.35–1.25) |      |                  |
|                        |           | 10 mg MEQ                          | 2011-2013 | 5596                           | 1.02 (0.66–1.58) |                  |      |                  |
|                        |           |                                    | 2015-2016 | 3819                           | 0.79 (0.41–1.54) |                  |      |                  |
|                        |           |                                    | 2017-2019 | 4598                           | 0.72 (0.38–1.36) |                  |      |                  |
|                        |           | Awake without delirium             | Delirium  | Mild pain<br><br>(vs. no pain) | No               | 2011-2013        | 5596 | 1.02 (0.68–1.52) |
|                        |           |                                    |           |                                |                  | 2015-2016        | 3819 | 1.07 (0.67–1.71) |
|                        |           |                                    |           |                                |                  | 2017-2019        | 4598 | 1.10 (0.71–1.70) |
| Yes                    | 2011-2013 |                                    |           |                                | 5596             | 0.96 (0.64–1.45) |      |                  |
|                        | 2015-2016 |                                    |           |                                | 3819             | 1.05 (0.65–1.68) |      |                  |
|                        | 2017-2019 |                                    |           |                                | 4598             | 1.07 (0.69–1.66) |      |                  |
| 10 mg MEQ              | 2011-2013 |                                    |           | 5596                           | 0.95 (0.66–1.50) |                  |      |                  |
|                        | 2015-2016 |                                    |           | 3819                           | 1.07 (0.67–1.71) |                  |      |                  |
|                        | 2017-2019 |                                    |           | 4598                           | 1.09 (0.71–1.68) |                  |      |                  |

\*Adjusted for time-fixed covariables, including admission category (medical, surgical, and trauma), age, sex, APACHE IV Score, body mass index, and Charlson Comorbidity Index.

†Adjusted for time-varying covariables on day  $t$ , including day of ICU admission, modified Sequential Organ Failure Assessment score (without neurologic component), use of invasive mechanical ventilation, use of a benzodiazepine, and use of an opioid.
